# Supplementary material for: Poly(arylene ether ketone)s with pendant porphyrins: synthesis and investigation on optical limiting properties
Source: Royal Society of Chemistry journal article supplement (doi:10.1039/c5ra05453b), 2015-01-01
Supplement: c5ra05453b1.pdf [file c5ra05453b1.pdf]

## Supporting Information

### Poly(arylene ether ketone)s with Pendant Porphyrins: Synthesis and Investigation on Optical Limiting Properties

Yinlong Du,<sup>a</sup> Kai Zhu,<sup>a</sup> Yu Fang,<sup>b</sup> Shuling Zhang,<sup>a</sup> Xingrui Zhang,<sup>a</sup> Yaning Lu,<sup>a</sup> Yanchao Yang,<sup>a</sup> Yinglin Song,<sup>b</sup> and Guibin Wang\*<sup>a</sup>

<sup>a</sup>College of Chemistry, Key Laboratory of High Performance Plastics, Ministry of Education, Jilin University, Changchun 130012, China

<sup>b</sup>College of Physics, Optoelectronics and Energy, Soochow University, Suzhou 215006, China

The nonlinear optical behavior of the polymers in THF were measured by using *Z*-scan technique under open-aperture and closed-aperture configuration with 4 ns pulsed laser irradiation at 532 nm with an intensity of 5.3 μJ. Theoretically, the nonlinear absorption coefficient  $\beta$  of the materials can be determined by the fitting of the experimental data based on equation (1).<sup>49</sup>

$$T(z, s=1) = \sum_{m=0}^{\infty} \frac{[-q_0(z)]^m}{(m+1)^{3/2}} \quad (1)$$

Here  $q_0(z) = \beta I_0(t) L_{\text{eff}} / (1+z^2/z_0^2)$ ,  $I_0(t)$  is the intensity of laser beam at focus ( $z=0$ ),  $L_{\text{eff}} = [1-\exp(-\alpha_0 L)]/\alpha_0$  is the effective thickness,  $\alpha_0$  is the linear absorption coefficient,  $L$  is the sample thickness,  $z_0$  is the diffraction length of the beam, and  $z$  is the sample position. Thus, the nonlinear absorption coefficients of the polymers can be determined by fitting the experimental data with equation (1). The nonlinear refractive coefficients ( $n_2$ ) of the polymers can be determined by fitting the experimental data using equation (2).<sup>49</sup>

$$T(z, \Delta\Phi) = 1 + 4\Delta\Phi x / (x^2 + 9)(x^2 + 1) \quad (2)$$

Where  $x = z/z_0$  and  $\Delta\Phi$  is on-axis phase change caused by the nonlinear refractive index of the sample and  $\Delta\Phi = 2\pi I_0(1 - e^{-\alpha L})n_2/\lambda\alpha_0$ .

In accordance with the observed  $\beta$  and  $n_2$  values, the third order susceptibility  $\chi^{(3)}$  value can be calculated through the following equation:

$$|\chi^{(3)}| = \sqrt{\left| \frac{cn_0^2}{80\pi} n_2 \right|^2 + \left| \frac{9 \times 10^8 \varepsilon_0 n_0^2 c^2}{4\pi\omega} \beta \right|^2} \quad (3)$$

Where  $\varepsilon_0$  is the permittivity of vacuum,  $c$  is the speed of light,  $n_0$  represents the refractive index of the medium, and  $\omega = 2\pi c/\lambda$ .<sup>49</sup> The calculated results of the nonlinear optical coefficients for all the samples in THF were summarized in Table 3.

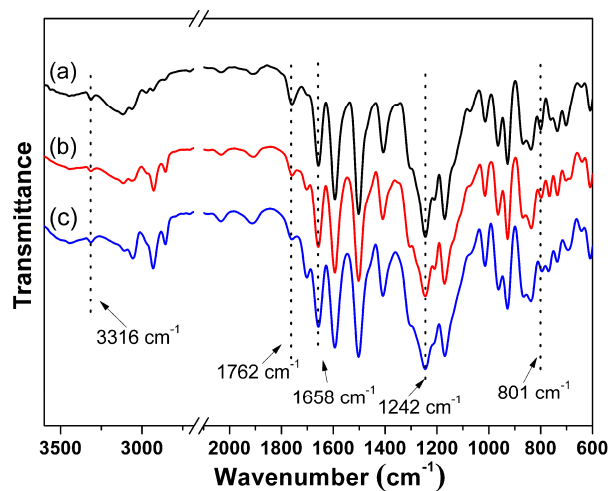

Fig. S1 IR spectra of (a) PAEK-COOH30%-TPP (b) PAEK-COOH30%-TTP, and (c) PAEK-COOH50%-TNP.

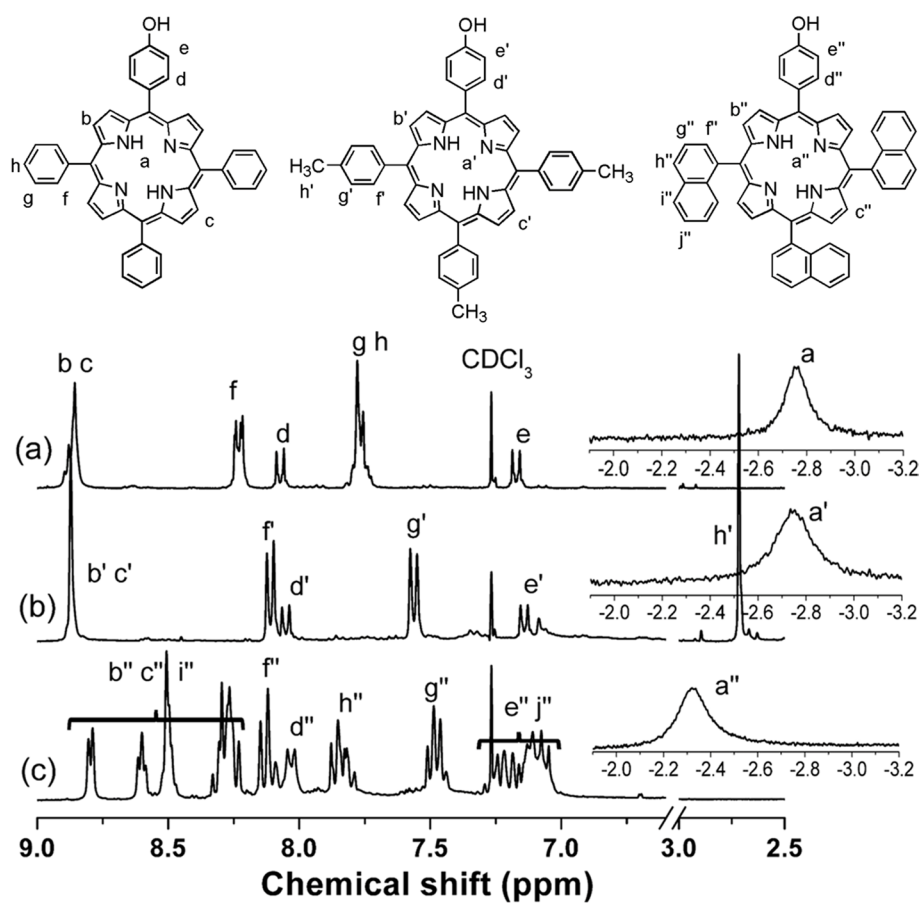

Fig. S2  $^1\text{H}$  NMR spectra of (a) OH-TPP, (b) OH-TTP, and (c) OH-TNP.



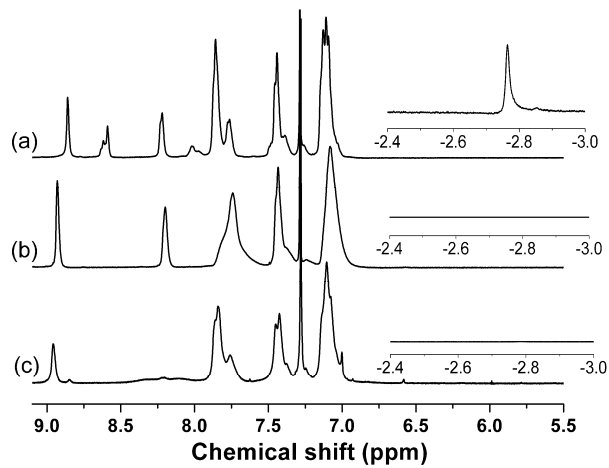

Fig. S3  $^1\text{H}$  NMR spectra of (a) PAEK-COOH30%-TPP, (b) PAEK-COOH30%-ZnTPP, and (c) PAEK-COOH30%-PbTPP.

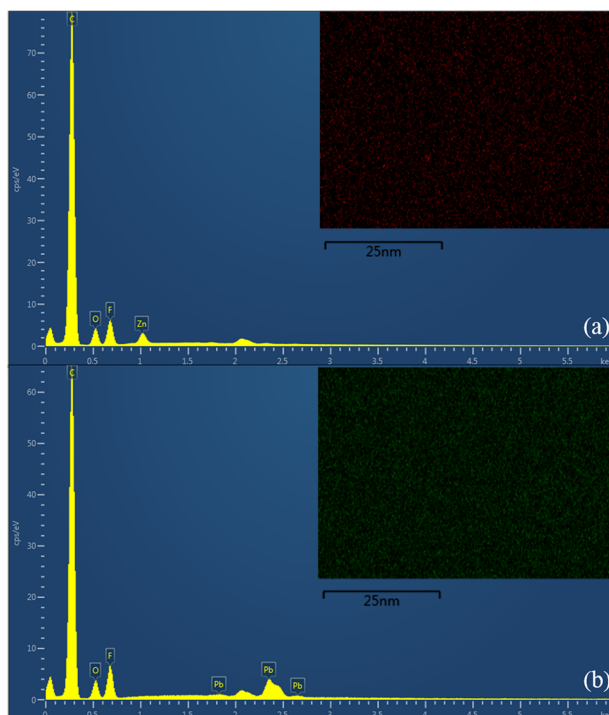

Fig. S4 EDS mapping photographs of (a) PAEK-COOH30%-ZnTPP and (b) PAEK-COOH30%-PbTPP. The red/green dots represented the position of Zn/Pb element.

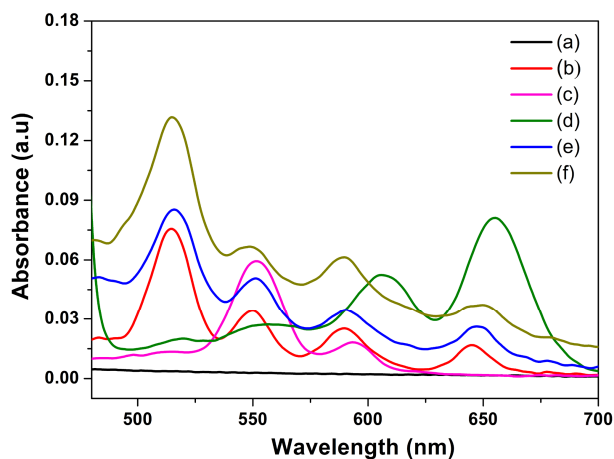

Fig. S5 UV-vis absorption spectra of (a) PAEK-COOH30%, (b) PAEK-COOH30%-TPP, (c) PAEK-COOH30%-ZnTPP, (d) PAEK-COOH30%-PbTPP, (e) PAEK-COOH30%-TTP, and (f) PAEK-COOH30%-TNP.

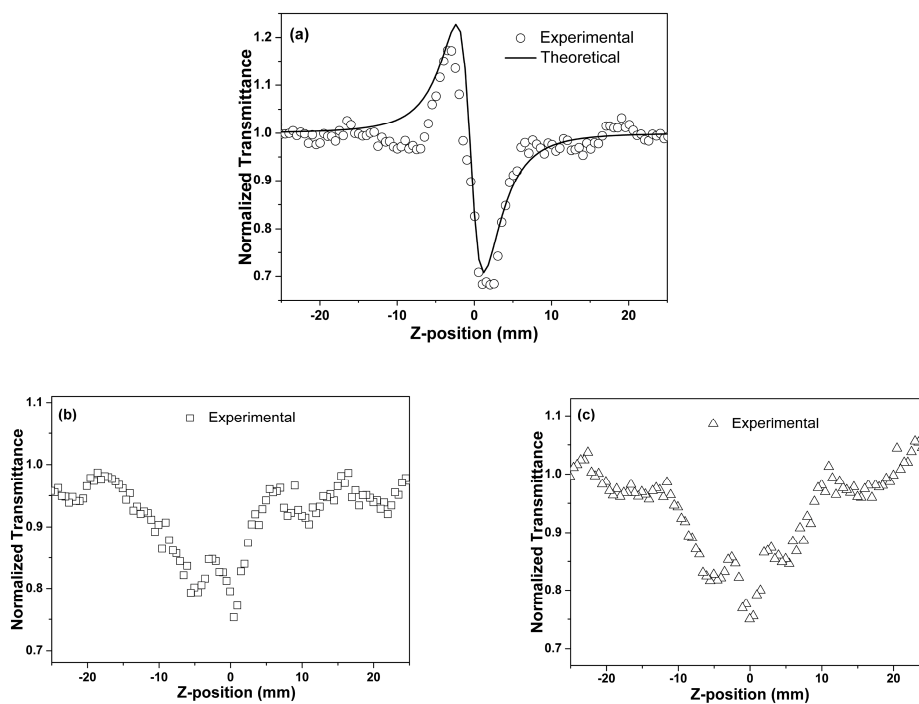

Fig. S6 Normalized closed Z-scan curves of (a) PAEK-COOH30%-TPP, (b) PAEK-COOH30%-ZnTPP, and (c) PAEK-COOH30%-PbTPP.

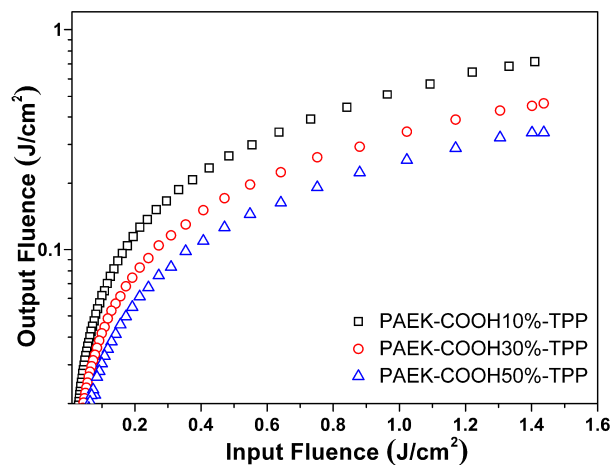

Fig. S7 Optical limiting responses of PAEK-COOH10%-TPP, PAEK-COOH30%-TPP, and PAEK-COOH50%-TPP at the same concentration of 0.25 mg/mL at 532 nm in THF.
